# Supplementary material for: Metabolically Tailored Selection of Ornamental Rose Cultivars through Polyamine Profiling, Osmolyte Quantification and Evaluation of Antioxidant Activities
Source: MDPI journal article supplement (doi:10.3390/horticulturae10040401), 2024-04-15
Supplement: s1 [file s1]

|                  |                      | Cultivar |               |                       | Organ    |               |                       | Cultivar x Organ |               |                       |
|------------------|----------------------|----------|---------------|-----------------------|----------|---------------|-----------------------|------------------|---------------|-----------------------|
| Parameters       |                      | <i>F</i> | <i>p</i> <.05 | <i>p</i>              | <i>F</i> | <i>p</i> <.05 | <i>p</i>              | <i>F</i>         | <i>p</i> <.05 | <i>p</i>              |
| Osmolytes        | Proline              | 95.09    | *             | 2.30 e <sup>-51</sup> | 4129.60  | *             | 9.71 e <sup>-76</sup> | 99.98            | *             | 2.82 e <sup>-52</sup> |
|                  | Glycine betaine      | 4.98     | *             | 4.13 e <sup>-08</sup> | 233.90   | *             | 1.63 e <sup>-26</sup> | 7.39             | *             | 6.28 e <sup>-12</sup> |
|                  | Putrescine           | 57.54    | *             | 2.14 e <sup>-42</sup> | 638.01   | *             | 4.28 e <sup>-42</sup> | 81.36            | *             | 1.51 e <sup>-48</sup> |
|                  | Spermidine           | 44.72    | *             | 5.06 e <sup>-38</sup> | 876.50   | *             | 1.57 e <sup>-47</sup> | 51.95            | *             | 1.31 e <sup>-40</sup> |
|                  | Spermine             | 81.09    | *             | 1.73 e <sup>-48</sup> | 2403.25  | *             | 1.12 e <sup>-65</sup> | 78.32            | *             | 7.26 e <sup>-48</sup> |
| Antioxidants     | ABTS                 | 34.62    | *             | 1.05 e <sup>-33</sup> | 136.70   | *             | 1.32 e <sup>-19</sup> | 86.62            | *             | 1.12 e <sup>-49</sup> |
|                  | RSC NO               | 18.79    | *             | 4.85 e <sup>-24</sup> | 7.59     | *             | 7.00 e <sup>-03</sup> | 13.89            | *             | 1.05 e <sup>-19</sup> |
|                  | C. tann              | 140.09   | *             | 1.88 e <sup>-58</sup> | 16.47    | *             | 1.07 e <sup>-04</sup> | 116.48           | *             | 4.62 e <sup>-55</sup> |
| Mineral elements | Nitrogen content (N) | 6.55     | *             | 1.13 e <sup>-10</sup> | 832.10   | *             | 1.25 e <sup>-46</sup> | 7.65             | *             | 2.65 e <sup>-12</sup> |
|                  | Carbon content (C)   | 0.17     | NS            | 1.00                  | 1.69     | NS            | 0.20                  | 0.19             | NS            | 1.00                  |
